# Supplementary material for: Intracranial hemorrhage in a large cohort of patients supported with veno-venous ECMO. A retrospective single-center analysis
Source: PubMed Central journal article supplement — Perfusion. 2023 Nov 10;39(8):1667–75. doi: 10.1177/02676591231213514 (PMC11490057; doi:10.1177/02676591231213514), 2023-11-10
Supplement: sj-pdf-1-PRF-10.1177_02676591231213514.pdf [file sj-pdf-1-PRF-10.1177_02676591231213514.pdf]

## Supplement

Table S1

|             | Left | Right | Bi-Hemispheric | Not Described |
|-------------|------|-------|----------------|---------------|
| IPH         | 9    | 15    | 23             | 1             |
| SAH         | 7    | 6     | 12             | 1             |
| SDH         |      | 3     | 2              | 1             |
| Chronic SDH |      | 2     |                |               |

*Table S1 shows detected intracranial bleeding localizations. Most patients had more than one intracranial bleeding localization. 16 of 23 bi-hemispheric ICBs were diffuse microbleedings. Abbreviations: IPH: intraparenchymal hemorrhage; SAB: subarachnoidal hemorrhage; SDH: subdural hemorrhage.*

### Complete Baseline Information

| Variable                                                    | All<br>N=556        | ICB<br>N=61                     | No ICB<br>N=495     | P-value          |
|-------------------------------------------------------------|---------------------|---------------------------------|---------------------|------------------|
| <b>General Data</b>                                         |                     |                                 |                     |                  |
| Age                                                         | 52.9 (41.3-62.1)    | 55.4 (46.1-66.2)                | 52.7 (40.7-61.8)    | 0.071            |
| Male Sex                                                    | 368 (66%)           | 41 (67%)                        | 327 (66%)           | 0.85             |
| Survival to Hospital Discharge (%)                          | 354 (64%)           | 18 (30%)                        | 336 (68%)           | <b>&lt;0.001</b> |
| ECMO Duration (days)                                        | 9 (6-15)            | 9 (6-16)                        | 9 (6-15)            | 0.856            |
| SOFA Score                                                  | 13 (10-16)          | 16 (13-18)                      | 13 (10-16)          | <b>&lt;0.001</b> |
| <b>ECMO Indication</b>                                      |                     |                                 |                     | 0.155            |
| Bacterial Pneumonia                                         | 271 (49)            | 32 (52)                         | 239 (48)            |                  |
| Viral Pneumonia                                             | 75 (13)             | 8 (13)                          | 67 (14)             |                  |
| ALF After Trauma                                            | 34 (6)              | 1 (2)                           | 33 (7)              |                  |
| ALF After Surgery                                           | 96 (17)             | 9 (15)                          | 87 (18)             |                  |
| ALF After Chemotherapy                                      | 13 (2)              | 4 (7)                           | 9 (2)               |                  |
| Other                                                       | 67 (12)             | 7 (11)                          | 60 (12)             |                  |
| <b>Laboratory Testing</b>                                   |                     |                                 |                     |                  |
| Creatinine (mg/dl)                                          | 1.2 (0.8-2.1)       | 1.7 (1.1-2.7)                   | 1.2 (0.8-2.1)       | <b>0.006</b>     |
| Impaired Kidney Function (creatinine >1.5mg/dl) Before ECMO | 341 (63%)           | 47 (77%)                        | 294 (61%)           | <b>0.013</b>     |
| aPTT (s)                                                    | 42 (35-55)          | 46 (39.5-61.5)                  | 42 (35-55)          | <b>0.024</b>     |
| Prothrombin Time (%)                                        | 76 (58-92)          | 71 (50-89)                      | 76 (60-92)          | 0.141            |
| Fibrinogen (mg/dl)                                          | 500 (342-644)       | 515 (352-646)                   | 500 (339-644.5)     | 0.753            |
| Platelets (/nl)                                             | 173 (100-269)       | 98 (47-212)                     | 182.5 (113-275)     | <b>&lt;0.001</b> |
| Blood-Urea (mg/dl)                                          | 58 (38-98)          | 65 (47-130)                     | 57 (36-95)          | <b>0.006</b>     |
| Bilirubin (mg/dl)                                           | 0.8 (0.5-1.9)       | 0.8 (0.6-2.4)                   | 0.8 (0.5-1.9)       | 0.244            |
| ASAT (U/L)                                                  | 689 (36-152)        | 103 (43-208)                    | 66 (34-14)          | <b>0.036</b>     |
| ALAT (U/L)                                                  | 43 (24-82)          | 47 (27-77)                      | 42 (24-84)          | 0.470            |
| LDH (U/L)                                                   | 418 (274-676)       | 550 (324-900)                   | 408 (270-651)       | <b>0.002</b>     |
| CRP (mg/dl)                                                 | 146 (44-251)        | 163 (75-210)                    | 1423(44-249)        | 0.126            |
| AT3 (%)                                                     | 61 (47-78)          | 59 (43-70)                      | 61 (47-79)          | 0.135            |
| White Blood Cells (/nl)                                     | 12.8 (7.9-19.1)     | 11.8 (7.0-20.0)                 | 12.8 (8.1-19.0)     | 0.368            |
| Cholinesterasis (U/L)                                       | 4,248 (2,664-6,887) | N=21 3,503<br>(1,967.5-5,831.5) | 4,412 (2,763-7,019) | 0.175            |
| CK (U/L)                                                    | 204 (76-705)        | 325 (98-841)                    | 200 (74-684)        | 0.253            |
| Albumin (g/L)                                               | 22 (17-26)          | 20 (14-26)                      | 22 (18-26)          | <b>0.043</b>     |

|                                                   |                       |                        |                       |              |
|---------------------------------------------------|-----------------------|------------------------|-----------------------|--------------|
| Alkaline Phosphatasis (U/L)                       | 95 (63-152)           | 120 (67-217)           | 94 (63-147)           | 0.241        |
| <b>Ventilator Settings and Blood Gas Analysis</b> |                       |                        |                       |              |
| PEEP (mbar)                                       | 15 (12-17)            | 15 (13-18)             | 15 (12-17)            | 0.475        |
| PaCO <sub>2</sub> (mmHg)                          | 64 (51-78)            | 71 (57-88)             | 62 (50-77)            | <b>0.009</b> |
| Delta paCO <sub>2</sub> (pre- (2hrs)) (mmHg)      | 26 (15-41)            | 37 (19-49)             | 26 (14-40)            | <b>0.007</b> |
| PaO <sub>2</sub> (mmHg)                           | 67 (56-81)            | 68 (58-77)             | 66 (56-82)            | 0.901        |
| pH                                                | 7.22 (7.15-7.3)       | 7.2 (7.11-7.28)        | 7.23 (7.15-7.31)      | 0.094        |
| Delta pH (pre- (2hrs))                            | -0.19 (-0.28 - -0.12) | -0.21 (-0.31 - -0.14)  | -0.18 (-0.27 - -0.11) | 0.07         |
| pAW mean (mbar)                                   | 22 (20-25)            | 22 (19.5-27)           | 22 (20-25)            | 0.482        |
| pMax (mbar)                                       | 35 (30-38)            | 35 (30-38)             | 34 (30-38)            | 0.315        |
| Norepinephrine (mg/h)                             | 1.6 (0.6-3)           | 2.5 (0.8-4.9)          | 1.5 (0.6-3)           | <b>0.001</b> |
| Delta Norepinephrine (pre- (2hrs))                | 0.4 (0 -1.1)          | 1 (0.1-2.3)            | 0.4 (0-1)             | <b>0.005</b> |
| MAP (mmHg)                                        | 68 (61-76)            | 67 (61-79)             | 68 (61-76)            | 0.663        |
| Delta MAP (pre- (2hrs)) (mmHg)                    | -7 (-18-3)            | -10.5 (-24-3.5)        | -7 (-17-3)            | 0.173        |
| Factor XIII (n=97)                                | 63 (48-90.5)          | (n=8) 51.5 (35.2-64.5) | (n=89) 63 (49-93.5)   | 0.057        |

*Table S2 shows the patient characteristics before starting V-V ECMO. For paCO<sub>2</sub> and norepinephrine, the change from pre-cannulation to 2 hours after starting V-V ECMO (Delta-values) is presented. Data are shown as median and IQR (25<sup>th</sup>-75<sup>th</sup>). SOFA: Sequential Organ Failure Assessment; aPTT: activated partial Thromboplastin-Tim; PT: Prothrombin Time; ASAT: Aspartat-Aminotransferasis; ALAT: Alanine Aminotransferasis; LDH: Lactate-Dehydrogenasis; CRP: C-reactive Protein. AT3: Anti-Thrombine 3; WBC: White Blood Cells; CK: Creatin-Kinasis; AP: Alkaline Phosphatasis; PEEP: Positive End-Expiratory Pressure; pAW: Mean Airway Pressure; MAP: Mean Arterial Pressure.*

## Variables During V-V ECMO Treatment

Corresponding to the variables before starting V-V ECMO shown in Table 1, the same variables were analyzed during V-V ECMO treatment. Results are shown as median and IQR (25<sup>th</sup>-75<sup>th</sup>) in the Supplement Table S3.

| Variable<br>(Median During<br>V-V ECMO) | All (Median IQR 25-75)<br>N=556 | ICB<br>N=61                 | No ICB<br>N=495              | P-value |
|-----------------------------------------|---------------------------------|-----------------------------|------------------------------|---------|
| Creatinine (mg/dl)                      | 1.1 (0.7-1.7)                   | 1.3 (0.8-1.9)               | 1.1 (0.7-1.6)                | 0.125   |
| aPTT (s)                                | 50 (44-56)                      | 47 (42-52)                  | 50 (44-57)                   | 0.01    |
| aPT (%)                                 | 73 (58-86)                      | 68 (59-87)                  | 74 (58-86)                   | 0.762   |
| Fibrinogen (mg/dl)                      | 418 (307-553)                   | 439 (268-602)               | 417 (307-546)                | 0.682   |
| Platelets (/nl)                         | 1,201 (71-176)                  | 80 (34-139)                 | 124 (76-179)                 | <0.001  |
| Blood-Urea (mg/dl)                      | 71 (46-103)                     | 99 (59-125)                 | 68 (48-98)                   | 0.001   |
| Bilirubin (mg/dl)                       | 1.1 (0.6-3)                     | 2.2 (0.9-5.4)               | 1 (0.5-2.7)                  | <0.001  |
| ASAT (U/L)                              | 70 (39-143)                     | 82 (51-289)                 | 66 (34-148)                  | 0.026   |
| ALAT (U/L)                              | 55 (31-106)                     | 60 (34-159)                 | 53 (18-103)                  | 0.113   |
| LDH (U/L)                               | 442 (319-630)                   | 534 (324-900)               | 435 (312-615)                | 0.012   |
| CRP (mg/dl)                             | 125 (61-183)                    | 165 (61-208)                | 121 (61-178)                 | 0.0037  |
| AT3 (%)                                 | 74 (55-93)                      | 69 (47-87)                  | 61 (47-79)                   | 0.043   |
| WBC (/nl)                               | 12.8 (9-17.7)                   | 12.9 (8.4-19)               | 12.7 (9.2-17.5)              | 0.676   |
| Cholinesterasis (U/L)                   | N=163 3,867<br>(2,669-5,967)    | N=15 3,189<br>(1,987-4,642) | N=148 3,895<br>(2,762-6,119) | 0.069   |
| CK (U/L)                                | 166 (623-610)                   | 233 (91-952)                | 158 (62-582)                 | 0.19    |
| Albumin (g/L)                           | 22 (20-25)                      | 21 (19-25)                  | 22 (20-26)                   | 0.301   |
| AP (U/L)                                | 1,134 (69-186)                  | 184 (75-274)                | 110 (69-179)                 | 0.001   |
| PEEP (mbar)                             | 14 (11-16)                      | 15 (12-17)                  | 13 (10-16)                   | 0.015   |
| PaCO <sub>2</sub> (mmHg)                | 40 (37-43)                      | 39 (37-43)                  | 40 (37-43)                   | 0.752   |

|                         |                  |                 |                  |       |
|-------------------------|------------------|-----------------|------------------|-------|
| PaO <sub>2</sub> (mmHg) | 76 (69-83)       | 73 (67-81)      | 66 (56-82)       | 0.118 |
| pH                      | 7.43 (7.39-7.45) | 7.42 (7.37-7.5) | 7.43 (7.4-7.45)  | 0.447 |
| pAW mean (mbar)         | 18 (15-21)       | 19 (17-22)      | 18 (15-21)       | 0.009 |
| pMax (mbar)             | 35 (23-28)       | 27 (24-29)      | 25 (23-28)       | 0.015 |
| Norepinephrine (mg/h)   | 0.2 (0-0.5)      | 0.3 (0-0.6)     | 0.1 (0-0.4)      | 0.015 |
| MAP (mmHg)              | 75 (71-80)       | 75 (70-80)      | 75 (71-80)       | 0.929 |
| Factor XIII (n=139)     | 53 (41-77)       | N=13 38 (27-49) | N=126 56 (42-79) | 0.001 |

*Table S3 shows the variables as median and IQR during the ECMO treatment.*

*aPTT: activated partial Thromboplastin-Time; PT: Prothrombin Time; ASAT: Aspartat-Aminotransferasis; ALAT: Alanine Aminotransferasis; LDH: Lactate-Dehydrogenasis; CRP: C-reactive Protein; AT3: Anti-Thrombine 3; WBC: White Blood Cells; CK: Creatin-Kinasis; AP: Alkaline Phosphatasis; PEEP: Positive End-Expiratory Pressure; pAW: Mean Airway Pressure; MAP: Mean Arterial Pressure.*

### Extreme Values of Laboratory Testing During V-V ECMO Treatment

| Variable                   | All (Median IQR 25-75)<br>N=556 | ICB<br>N=61   | No ICB<br>N=495 | P-value |
|----------------------------|---------------------------------|---------------|-----------------|---------|
| Maximal Creatinine (mg/dl) | 1.6 (1.0-2.7)                   | 2.1 (1.3-3.6) | 1.5 (1.0-2.6)   | 0.008   |
| Maximal aPTT (s)           | 78 (63-108)                     | 68 (567-115)  | 79 (64 -108)    | 0.162   |
| Minimal PT (%)             | 51 (39-67)                      | 50 (40-62.5)  | 51 (39-67)      | 0.424   |
| Minimal Fibrinogen (mg/dl) | 257 (164-373)                   | 247 (131-377) | 257 (168-373)   | 0.672   |
| Minimal Platelets (/nl)    | 73 (40-128)                     | 45 (22-87)    | 76 (42-132)     | <0.001  |
| Maximal Blood-Urea (mg/dl) | 111 (75-171)                    | 142 (89-218)  | 107 (74-167)    | 0.002   |
| Maximal Bilirubine (mg/dl) | 2 (1.0-5.2)                     | 3.8 (1.5-9.2) | 1.9 (0.9-4.9)   | 0.001   |

|                              |                              |                             |                              |        |
|------------------------------|------------------------------|-----------------------------|------------------------------|--------|
| Maximal ASAT (U/L)           | 161 (79-399)                 | 245 (122-831)               | 152 (77-371)                 | 0.005  |
| Maximal ALAT (U/L)           | 93 (46-228)                  | 113 (67-403)                | 92 (44-223)                  | 0.057  |
| Maximal LDH (U/L)            | 651 (433-1,052)              | 1,004 (516-2106)            | 637 (410-969)                | <0.001 |
| Maximal CRP (mg/dl)          | 237 (156-312)                | 251 (178-349)               | 234 (153-309)                | 0.089  |
| Maximal AT3 (%)              | 93 (68-114)                  | 92 (62-111)                 | 93 (70-116)                  | 0.079  |
| Maximal WBC (/nl)            | 19.7 (14.4-27.5)             | 21.1 (15-31)                | 19.4 (14.4-26.8)             | 0.238  |
| Minimal Cholinesterase (U/L) | N=233 3,400<br>(2,063-5,142) | N=25 2,150<br>(1,444-3,882) | N=208 3,539<br>(2,153-5,324) | 0.01   |
| Maximal CK (U/L)             | 588 (200-2089)               | 872 (271-3037)              | 576 (198-1961)               | 0.137  |
| Maximal AP (U/L)             | 156 (92-301)                 | 252 (77-472)                | 152 (93-285)                 | 0.031  |
| Minimal Factor XIII (n=148)  | 45 (33-62)                   | N=13 34 (21-44)             | N=135 46 (34-64)             | 0.009  |

*Table S4 shows extreme values of laboratory testing during V-V ECMO treatment.*

*Variables as median and IQR (25<sup>th</sup> -75<sup>th</sup>) during V-V ECMO treatment. aPTT:*

*activated partial Thromboplastin-Time; PT: Prothrombin Time; ASAT: Aspartat-*

*Aminotransferasis; ALAT: Alanine Aminotransferasis; LDH: Lactate-Dehydrogenasis;*

*CRP: C-reactive Protein; AT3: Anti-Thrombine 3; WBC: White Blood Cells; CK:*

*Creatin-Kinasi; AP: Alkaline Phosphatasis.*

|     |   | Number of ICBs | Frequency (%) |
|-----|---|----------------|---------------|
| Day | 0 | 13             | 21.3          |
|     | 1 | 10             | 16.4          |
|     | 2 | 2              | 3.3           |
|     | 3 | 4              | 6.6           |
|     | 4 | 2              | 3.3           |
|     | 5 | 4              | 6.6           |

|  |       |    |       |
|--|-------|----|-------|
|  | 6     | 1  | 1.6   |
|  | 9     | 2  | 3.3   |
|  | 10    | 2  | 3.3   |
|  | 11    | 2  | 3.3   |
|  | 12    | 2  | 3.3   |
|  | 13    | 1  | 1.6   |
|  | 14    | 2  | 3.3   |
|  | 15    | 2  | 3.3   |
|  | 17    | 1  | 1.6   |
|  | 20    | 1  | 1.6   |
|  | 21    | 1  | 1.6   |
|  | 22    | 1  | 1.6   |
|  | 24    | 1  | 1.6   |
|  | 27    | 1  | 1.6   |
|  | 30    | 2  | 3.3   |
|  | 32    | 1  | 1.6   |
|  | 33    | 1  | 1.6   |
|  | 36    | 1  | 1.6   |
|  | 55    | 1  | 1.6   |
|  | Total | 61 | 100.0 |

*Table S5: Exact timing of intracranial bleeding.*

Table S6

|                                                 | Number of Patients    |                           | Univariable Analysis |           |                  | Multivariable Regression Analysis Model 1<br>paCO <sub>2</sub> , Norepinephrine, Platelets <100/nl<br>AIC 334.405 |             |              | Multivariable Regression Analysis Model 2<br>paCO <sub>2</sub> , Norepinephrine, Platelets <50/nl<br>AIC 338.688 |             |              |
|-------------------------------------------------|-----------------------|---------------------------|----------------------|-----------|------------------|-------------------------------------------------------------------------------------------------------------------|-------------|--------------|------------------------------------------------------------------------------------------------------------------|-------------|--------------|
|                                                 | ICB<br>(n=61)<br>n(%) | No ICB<br>(n=495)<br>n(%) | Odds Ratio           | CI95%     | P-value          | Odds Ratio                                                                                                        | CI95%       | P-value      | Odds Ratio                                                                                                       | CI95%       | P-value      |
| Creatinine >1.5mg/dl Before ECMO Treatment      | 33<br>(54.1)          | 185<br>(37.4)             | 1.98                 | 1.15-3.40 | <b>0.013</b>     | 0.89                                                                                                              | 0.44-1.80   | 0.738        | 0.94                                                                                                             | 0.46-1.94   | 0.876        |
| aPTT >45s Before ECMO Treatment                 | 33<br>(54.1)          | 192<br>(38.8)             | 1.80                 | 1.05-3.08 | <b>0.031</b>     | 1.12                                                                                                              | 0.59-2.14   | 0.728        | 1.16                                                                                                             | 0.61-2.21   | 0.643        |
| Platelets <100/nl Before ECMO Treatment         | 31<br>(50.8)          | 104<br>(21.0)             | 3.82                 | 2.21-6.60 | <b>&lt;0.001</b> | 2.51                                                                                                              | 1.20-5.23   | <b>0.014</b> |                                                                                                                  |             |              |
| Platelets <50/nl Before ECMO Treatment          | 17<br>(27.9)          | 41 (8.2)                  | 4.21                 | 2.21-8.03 | <b>&lt;0.001</b> |                                                                                                                   |             |              | 3.55                                                                                                             | 1.65 - 7.62 | <b>0.001</b> |
| Blood-Urea > 100 mg/dl Before ECMO Treatment    | 20<br>(32.8)          | 105<br>(21.2)             | 1.81                 | 1.01-3.24 | <b>0.045</b>     | 1.34                                                                                                              | 0.69-2.78   | 0.357        | 1.25                                                                                                             | 0.62-2.53   | 0.533        |
| LDH >550 U/L Before ECMO Treatment              | 29<br>(47.5)          | 151<br>(30.5)             | 2.07                 | 1.20-3.57 | <b>0.009</b>     | 1.71                                                                                                              | 0.88-3.27   | 0.111        | 1.74                                                                                                             | 0.90-3.37   | 0.103        |
| paCO <sub>2</sub> >70mmHg Before ECMO Treatment | 31<br>(50.8)          | 171<br>(34.5)             | 1.96                 | 1.15-3.34 | <b>0.014</b>     | 3.63                                                                                                              | 1.68-7.83   | <b>0.001</b> | 3.55                                                                                                             | 1.65-7.62   | <b>0.001</b> |
| Delta paCO <sub>2</sub> >35mmHg                 | 33<br>(54.1)          | 156<br>(31.5)             | 2.56                 | 1.50-4.39 | <b>0.001</b>     | *                                                                                                                 |             |              |                                                                                                                  |             |              |
| Norepinephrine >2.5mg/h Before ECMO Treatment   | 30<br>(49.1)          | 138<br>(27.9)             | 2.5                  | 1.46-4.29 | <b>0.001</b>     | 1.67                                                                                                              | 0.86-3.21   | 0.128        | 1.64                                                                                                             | 0.85-3.15   | 0.140        |
| Delta Norepinephrine >1mg/h                     | 27<br>(44.2)          | 118<br>(23.8)             | 2.53                 | 1.47-4.37 | <b>0.001</b>     | *                                                                                                                 |             |              |                                                                                                                  |             |              |
| ASAT >80U/L Before ECMO Treatment               | 35<br>(57.3)          | 200<br>(40.4)             | 1.86                 | 1.08-3.21 | <b>0.025</b>     | 0.83                                                                                                              | 0.41 - 1.68 | 0.596        | 0.92                                                                                                             | 0.46 - 1.84 | 0.803        |
| SOFA Score                                      |                       |                           |                      |           |                  | 0.91                                                                                                              | 0.82-1.02   | 0.091        | 0.89                                                                                                             | 0.80-0.99   | 0.036        |
| pH Before ECMO Treatment                        |                       |                           |                      |           |                  | 0.08                                                                                                              | 0.004-1.62  | 0.101        | 0.06                                                                                                             | 0.003-1.17  | 0.064        |

Table S6 continued



|                                                        | <b>Multivariable Regression Analysis Model 4<br/>Delta paCO<sub>2</sub>, Delta Norepinephrine, Platelets &lt;50/nl<br/>AIC330.327</b> |            |                  |
|--------------------------------------------------------|---------------------------------------------------------------------------------------------------------------------------------------|------------|------------------|
|                                                        | Odds Ratio                                                                                                                            | CI95%      | P-value          |
| Creatinine >1.5mg/dl<br>Before ECMO<br>Treatment       | 1.23                                                                                                                                  | 0.59-2.57  | 0.589            |
| aPTT >45s<br>Before ECMO<br>Treatment                  | 1.11                                                                                                                                  | 0.59-2.12  | 0.741            |
| Platelets <100/nl<br>Before ECMO<br>Treatment          |                                                                                                                                       |            |                  |
| Platelets <50/nl<br>Before ECMO<br>Treatment           | 2.90                                                                                                                                  | 1.24-6.77  | <b>0.014</b>     |
| Platelets <20/nl<br>Before ECMO<br>Treatment           |                                                                                                                                       |            |                  |
| Blood-Urea > 100 mg/dl<br>Before ECMO<br>Treatment     | 1.18                                                                                                                                  | 0.58-2.40  | 0.654            |
| LDH >550 U/L<br>Before ECMO<br>Treatment               | 1.64                                                                                                                                  | 0.84-3.21  | 0.150            |
| paCO <sub>2</sub> >70mmHg<br>Before ECMO<br>Treatment  |                                                                                                                                       |            |                  |
| Delta paCO <sub>2</sub> >35mmHg                        | 5.34                                                                                                                                  | 2.36-12.09 | <b>&lt;0.001</b> |
| Norepinephrine<br>>2.5mg/h<br>Before ECMO<br>Treatment |                                                                                                                                       |            |                  |
| Delta Norepinephrine<br>>1mg/h                         | 1.69                                                                                                                                  | 0.90-3.19  | 0.104            |
| ASAT >80U/L<br>Before ECMO<br>Treatment                | 0.87                                                                                                                                  | 0.43-1.77  | 0.696            |
| SOFA Score                                             | 0.91                                                                                                                                  | 0.82-1.01  | 0.07             |
| pH Before ECMO<br>Treatment                            | 0.02                                                                                                                                  | 0.001-0.42 | <b>0.013</b>     |

*Table S6 shows calculated Odds Ratios for developing ICB during V-V ECMO. The tested variables were different between the groups before starting V-V ECMO, or additionally became different during ECMO treatment. Odds Ratios (OR) were calculated after dichotomizing the variables. The ICB group's median was used as a*

*cut-off value. Delta values represent the difference between pre-cannulation values and values 2 hours after starting V-V ECMO. In the multivariable analysis, all of these parameters were included, and platelets were calculated continuously to avoid overfitting. In Model 1  $\text{paCO}_2$  and norepinephrine were used, in Model 2 delta  $\text{paCO}_2$  and delta norepinephrine. CI95%: 95% confidence interval. Model 3 showed the lowest AIC value (AIC 328.137) and is shown in the main manuscript. SOFA: Sequential organ failure assessment; aPTT: activated partial Thromboplastin-Time; ASAT: Aspartat-Aminotransferasis; LDH: Lactate-Dehydrogenasis.*

110 patients had dual-lumen cannula. 12 patients had femoro-femoral cannulation.

All other patients had femoral drainage and jugular or subclavian return site.

#### Devices used, Pumps

|             |          |
|-------------|----------|
| Cardiohelp  | 140 (25) |
| Deltastream | 18 (3)   |
| DP 3        | 139 (25) |
| HemoLung    | 3 (1)    |
| RotafLOW    | 159 (29) |
| Sorin       | 97 (17)  |

#### Devices used, Oxygenators

|                |         |
|----------------|---------|
| Cardiohelp 5.0 | 14 (3)  |
| Cardiohelp 7.0 | 82 (15) |
| Cardiohelp IR  | 41 (7)  |
| ECC.O 5        | 97 (17) |
| ELS            | 23 (4)  |
| HemoLung       | 3 (0.5) |

|                   |          |
|-------------------|----------|
| Hilite LT         | 149 (27) |
| Hilite LT800      | 1 (0.2)  |
| ILA MV            | 4 (0.7)  |
| ILA-active        | 8 (1)    |
| MECC Quadrox-D BE | 7 (1)    |
| MECC Softline     | 5 (1)    |
| PALP              | 2 (0.4)  |

**ICB and Cannula Diameter**

| Cannula<br>Diameter<br>(French) |     | Cannula Diameter |    |    |    |     |    |     |    |    |    |    | Total |     |
|---------------------------------|-----|------------------|----|----|----|-----|----|-----|----|----|----|----|-------|-----|
|                                 |     | 15.5             | 16 | 19 | 20 | 21  | 22 | 23  | 24 | 25 | 27 | 29 |       | 31  |
| ICB                             | no  | 2                | 2  | 4  | 3  | 233 | 26 | 158 | 17 | 2  | 46 | 1  | 1     | 495 |
|                                 | yes | 0                | 0  | 0  | 0  | 25  | 2  | 26  | 4  | 0  | 3  | 0  | 1     | 61  |
| Sum                             |     | 2                | 2  | 4  | 3  | 258 | 28 | 184 | 21 | 2  | 49 | 1  | 2     | 556 |
